# Supplementary material for: A Versatile Strategy for the Fabrication of Poly(ethyl methacrylate) Composites
Source: MDPI journal article supplement (doi:10.3390/jcs6020040), 2022-01-24
Supplement: s1 [file s1]

Archive with 1 entries (1 files):
- jcs-1526982-supplementary.pdf
